# Supplementary material
Source: PubMed Central journal article supplement (PMC9731609)

# Supplementary Figure 2

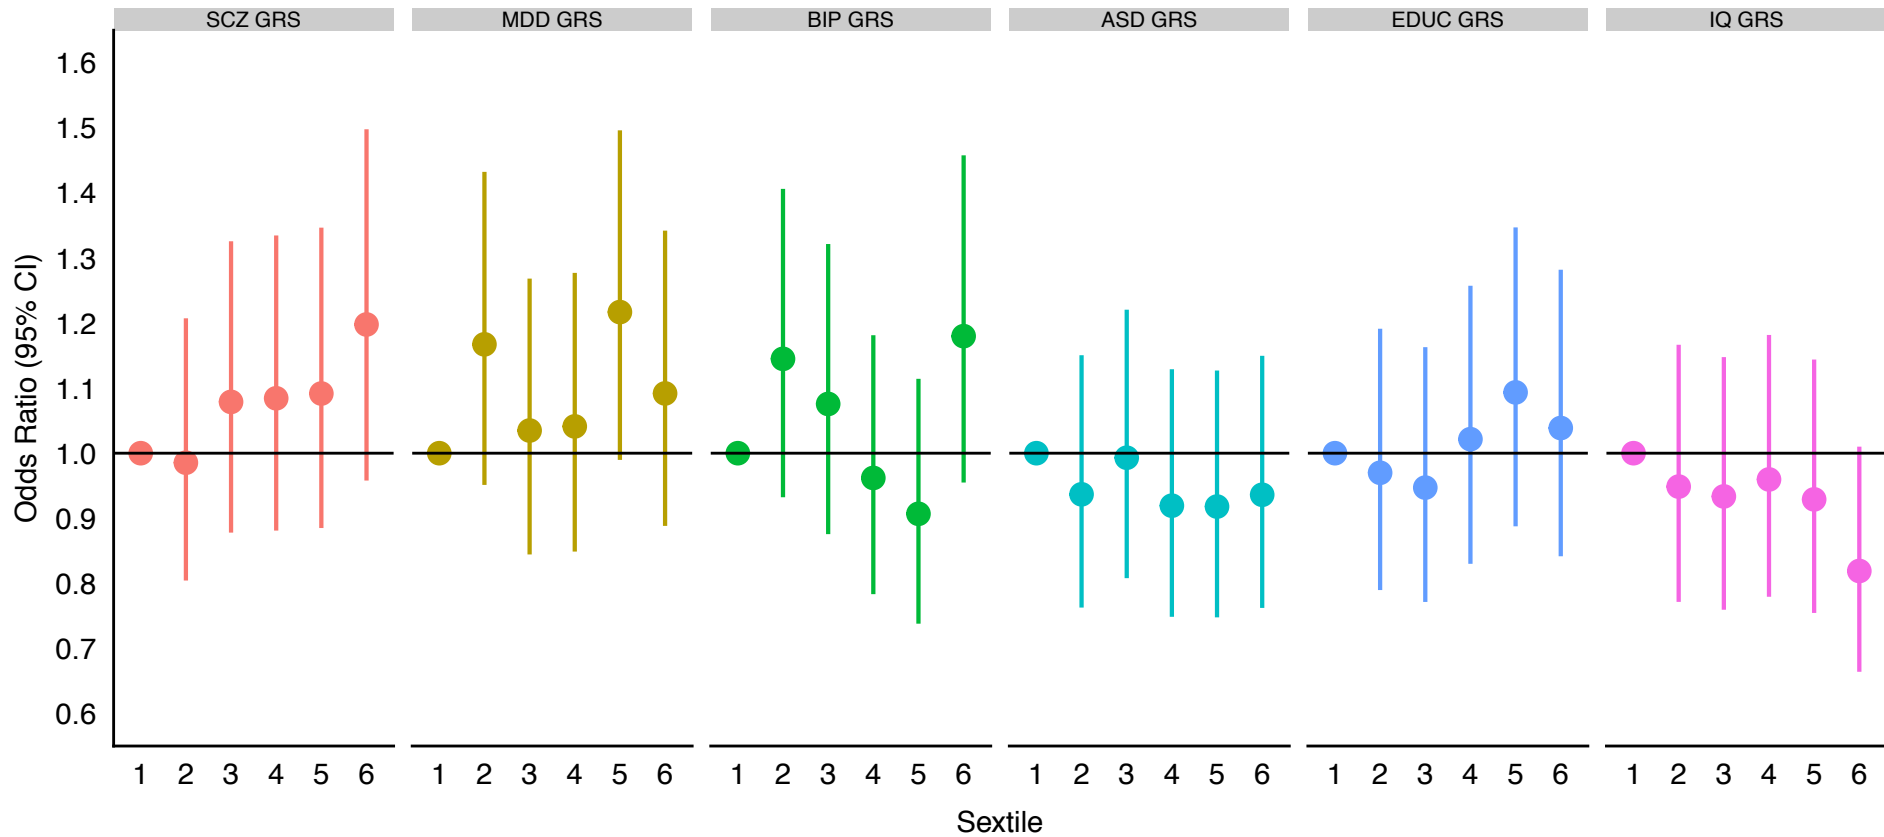

Supplement: NIHMS1852467-supplement-Supplementary_Figure_2.pdf [file NIHMS1852467-supplement-Supplementary_Figure_2.pdf]
